# Supplementary material for: A compendium of human gene functions derived from evolutionary modelling
Source: Springer Nature journal article supplement (doi:10.1038/s41586-025-08592-0), 2025-02-26
Supplement: MOESM1 [file 41586_2025_8592_MOESM1_ESM.pdf]

---

**Supplementary information**

---

**A compendium of human gene functions  
derived from evolutionary modelling**

---

In the format provided by the  
authors and unedited

## **Supplementary Results**

### **Comparing PAN-GO annotations to other sources of GO annotations**

Gene Ontology (GO) annotations for human genes can be obtained both from the GO knowledgebase, and automatic function prediction (AFP) algorithms. These other sources differ from the PAN-GO set here, in that they have not been designed to represent the known repertoire of human gene functions as completely, concisely and accurately as possible. Predicted annotations in the GO knowledgebase, as well as from AFP methods, are not explicitly traceable to the experimental evidence supporting them. We have performed analyses to demonstrate how PAN-GO annotations differ from these other sources, and how they impact the widely used genomic technique of GO enrichment analysis.

### **Comparing to other annotations available in the GO knowledgebase**

To characterize how the work reported here differs from the prior work of the GO Consortium, we performed a number of analyses to compare the PAN-GO annotation set to the other currently available GO annotation sets. These analyses demonstrate the value of the PAN-GO set in filling gaps in the previous sets of annotations, as well as excluding less informative annotations that are present in those previous sets. We show on previously published case studies that the PAN-GO annotation set removes or reduces the major bias that has been demonstrated to confound gene set enrichment analysis<sup>1</sup>.

#### **Coverage of annotations**

The PAN-GO annotations cover more protein-coding genes (17,027) than do experimental annotations (EXP; 13,844), and slightly less than computationally predicted annotations (IEA; 17,804) (Extended Data Figure 2). We note that, while PAN-GO annotations must be traceable to experimental evidence, the same is not true of computationally predicted GO annotations. We examined the breadth of the annotation coverage of each human gene by counting the number of different GO aspects to which the gene is annotated (MF, BP and CC). The PAN-GO set has a larger number of genes that are covered by all three GO aspects, and by at least two aspects, than either the experimental or computationally predicted annotation sets.

### **Distribution of annotations across different genes**

The distribution of annotations in the PAN-GO set is qualitatively and quantitatively different from the other sets. Qualitatively, it is a peaked distribution rather than monotonically decreasing, and quantitatively, it has a much shorter tail of genes with a large number of distinct GO terms (Extended Data Figure 3). Both of these properties show that PAN-GO annotations exhibit a much greater evenness of the annotation coverage across the genome, with fewer genes that have very few, or very many, distinct annotated functional characteristics. The peak in the PAN-GO set shows that a representative (mode) gene has 3-4 distinct GO terms describing its function, rather than 1 as for experimental or predicted annotations. Together with Extended Data Figure 2, this illustrates the extensive amount of additional information present in the PAN-GO annotations, compared to the GO annotations for human genes that were previously available. The shorter tail for PAN-GO in Extended Data Figure 3 shows that there are relatively few highly annotated genes (genes that are annotated to a large number of distinct GO terms) in the PAN-GO set, compared to experimental and computational annotations. In the PAN-GO annotation set, the top 10% most highly annotated genes account for 15% of the total annotations, while in the EXP set, the top 10% most highly annotated genes account for 37% of the total annotations. This bias in the experimental annotations is largely due to the bias in the experimental literature, rather than actual differences in the functional complexity of different genes. PAN-GO therefore dramatically reduces the number of annotations for genes that are highly annotated in other sets, which we explore further below.

### **GO terms used in PAN-GO compared to previously available GO annotations**

Supplementary Figure 1 shows how the PAN-GO annotations compare to two types of previously available GO annotations. The first set is the experimental annotations (EXP) for human genes, which can be traced to experimental evidence, but, as described in the main text, generally each describe the conclusions from a single experiment. The second set is computationally predicted annotations (inferred from electronic annotation, IEA) for human genes, which are determined using a variety of methods including InterPro2GO<sup>2</sup> and via 1:1 orthology relations determined by Ensembl Compara<sup>3</sup>. Details and references for each of the prediction methods is given in Supplementary Table 1.

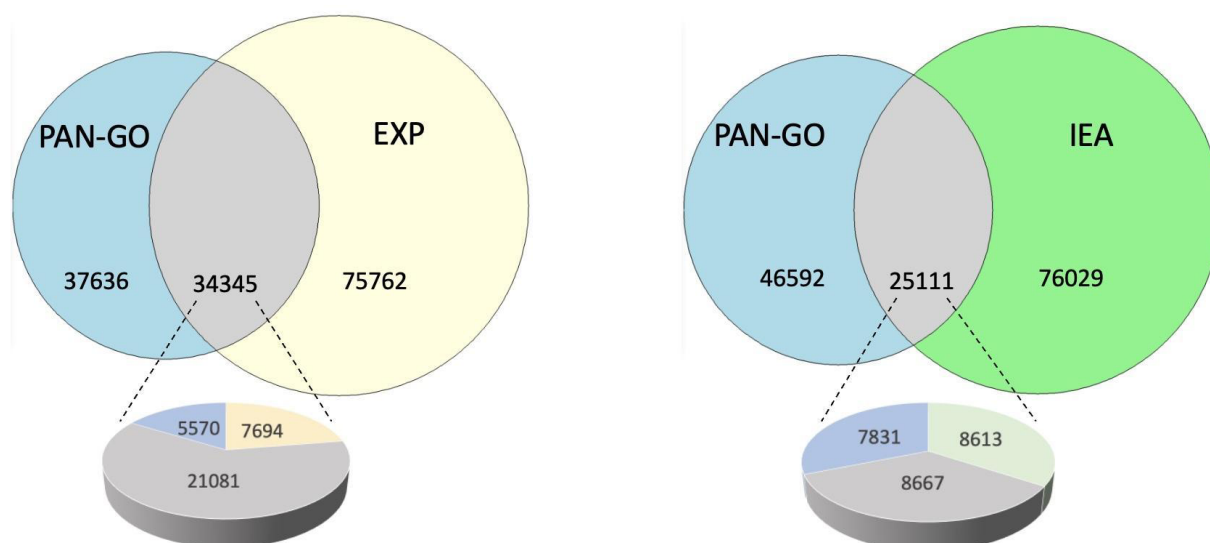

**Supplementary Figure 1. Comparison of PAN-GO annotations to experimental (EXP) and predicted (IEA) GO annotations for human genes.** The Venn diagrams show the number of annotations that are unique to each set, and the annotations that overlap to some degree between the sets (gray). In the case of overlap (gray), the pie charts show three different types of overlap: 1) identical (gray), i.e. the PAN-GO annotation is to the same GO term as in the other set, 2) PAN-GO more specific (blue), i.e. the PAN-GO annotation is to a related GO term that is more specific than in the other set, and 3) PAN-GO less specific, i.e. the PAN-GO annotation is to a related term that is less specific than in the other set.

**Supplementary Table 1. GO term prediction (IEA) methods included in comparison.** These are the methods currently used to produce predicted annotations included the GO knowledgebase. GO internal references (starting with GO\_REF:) describe specific annotation methods and are available at <https://github.com/geneontology/go-site/tree/master/metadata/gorefs/README.md>.

| Method                                                                                                                                        | Reference      | Brief description                                                                            |
|-----------------------------------------------------------------------------------------------------------------------------------------------|----------------|----------------------------------------------------------------------------------------------|
| Automatic transfer of experimentally verified manual GO annotation data to orthologs using Ensembl Compara                                    | GO_REF:0000107 | Homology, from experimental evidence propagated from one gene to one orthologous gene        |
| Gene Ontology annotation through association of InterPro records with GO terms                                                                | GO_REF:0000002 | Homology, from a hit to an InterPro signature                                                |
| Gene Ontology annotation based on Enzyme Commission mapping                                                                                   | GO_REF:0000003 | Imported from another resource, from mapping an EC number assigned in UniProt                |
| Gene Ontology annotation based on UniProtKB keyword mapping                                                                                   | GO_REF:0000004 | Imported from another resource, from mapping a manually assigned Swiss-Prot keyword          |
| Electronic Gene Ontology annotations created by transferring manual GO annotations between related proteins based on shared sequence features | GO_REF:0000104 | Homology, from manually curated UniRule                                                      |
| Automatic assignment of GO terms using logical inference, based on on inter-ontology links                                                    | GO_REF:0000108 | Logical assertion using the ontology, from asserted relation between different aspects of GO |
| Electronic Gene Ontology annotations created by ARBA machine learning models                                                                  | GO_REF:0000117 | Computational, from machine learning                                                         |

As shown in Supplementary Figure 1, over half (37,636) of the PAN-GO annotations are completely distinct from the experimental GO annotations (EXP); in addition, there are 5,570 PAN-GO annotations that are to a related term, but greater specificity, than any experimental annotation. In both of these cases, PAN-GO annotations add information beyond what was previously available. Interestingly, PAN-GO annotations overlap even less with predicted GO annotations (IEA) than with experimental GO annotations.

To better understand the differences between these sets of GO annotations, we identified the GO terms that appeared more commonly in the PAN-GO set compared to the EXP set (Supplementary Table 2), and vice versa (Supplementary Table 3). We first consider the terms that often appear in PAN-GO annotations but not EXP annotations for the same gene (Supplementary Table 2). For molecular function, three of the GO terms that appear most commonly in PAN-GO annotations but not EXP annotations for a given gene are related to the function, and type of regulatory region bound by, DNA binding transcription factors. This reflects the fact that many human transcription factors lack experimental evidence for their functions, and are supported only by experimental evidence for homologous genes. A similar situation obtains for olfactory receptors, which mostly remain experimentally uncharacterized. Three of the biological process terms frequently added by PAN-GO reflect the larger processes (transcription regulation and signaling) that correlate with the molecular functions above. In addition, the many genes involved in cell differentiation and the innate immune response are often only annotated in the PAN-GO set. In general, then, the PAN-GO set includes many important functions of human genes that have been highly studied in related genes in other organisms, but not directly for a human gene itself.

**Supplementary Table 2. Most frequent GO terms in PAN-GO but not EXP for same gene**

| MF term                                                                            | Number MF | BP term                                                       | Number BP | CC term                          | Number CC |
|------------------------------------------------------------------------------------|-----------|---------------------------------------------------------------|-----------|----------------------------------|-----------|
| GO:0000981 (DNA-binding transcription factor activity, RNA polymerase II-specific) | 788       | GO:0006357 (regulation of transcription by RNA polymerase II) | 942       | GO:0005634 (nucleus)             | 1170      |
| GO:0000978 (RNA polymerase II cis-regulatory region sequence-specific DNA binding) | 493       | GO:0030154 (cell differentiation)                             | 189       | GO:0005737 (cytoplasm)           | 1000      |
| GO:0004984 (olfactory receptor activity)                                           | 216       | GO:0007186 (G protein-coupled receptor signaling pathway)     | 183       | GO:0005886 (plasma membrane)     | 763       |
| GO:0005509 (calcium ion binding)                                                   | 152       | GO:0007165 (signal transduction)                              | 179       | GO:0005615 (extracellular space) | 568       |

|                                                                                              |     |                                     |     |                                                    |     |
|----------------------------------------------------------------------------------------------|-----|-------------------------------------|-----|----------------------------------------------------|-----|
| GO:0000977 (RNA polymerase II transcription regulatory region sequence-specific DNA binding) | 141 | GO:0045087 (innate immune response) | 172 | GO:0005887 (integral component of plasma membrane) | 409 |
|----------------------------------------------------------------------------------------------|-----|-------------------------------------|-----|----------------------------------------------------|-----|

We next consider the GO terms that often appear in EXP annotations but not PAN-GO annotations for the same gene (Supplementary Table 3). For molecular function, these are all subtypes of noncovalent binding functions. Two of these terms indicate that a protein binds to itself. While this is an important property of the functional structure of a protein (its “quaternary structure,” e.g. dimer, trimer, etc.), it does not in itself represent an important functional characteristic, and is generally not used in PAN-GO annotations. The other terms often missing from the PAN-GO set (RNA binding, enzyme binding, protein kinase binding) are often parts of other functions that are in the PAN-GO set, so they would not represent independent functional characteristics even though they are not related in the GO ontology. For example, a *protein kinase inhibitor* may bind to a protein kinase (GO term: *protein kinase binding*) and alter the conformation of that kinase such that it does not function. If *protein kinase inhibitor* is selected for modeling, then *protein kinase binding* is considered to be a redundant characteristic. For biological process, the top terms with experimental evidence that are missing from the PAN-GO set are all regulation terms: positive and negative regulation of transcription, and positive regulation of cell proliferation. Primary annotations to these GO terms are often assigned based on experiments that knock out a gene or overexpress a gene, and measure downstream effects such as changes in the expression of other genes, or on cell growth and division. These effects are often “phenotypes” that can be far downstream, and very indirectly related to, the actual function of a gene. Because the PAN-GO process involves a review of all primary GO annotations in a family, PAN-GO curators will not select these terms for evolutionary modeling if, when considered together with all the function evidence in the family, those terms are judged to be indirect effects that arise from the annotated “core” functions of the gene. For GO cellular component, *extracellular exosome* is generally lacking from the PAN-GO set. This is because an exosome is very rarely the location in which a given gene product has been demonstrated to function, even if an experiment has shown it to be located there under certain conditions. In general, many primary annotations to GO cellular component terms are based on an experimental observation of subcellular localization under a particular condition; however, PAN-GO annotations strive to represent where the protein is functionally active, in accordance with the original specification of that aspect of the GO<sup>4</sup> and the definition of gene function<sup>5</sup>. The PAN-GO process of

considering all functional characteristics plays an important role in helping to select which location(s) are likely to be the ones in which a protein is active.

**Supplementary Table 3. Most frequent GO terms in EXP but not PAN-GO for same gene**

| MF term                                        | Number MF | BP term                                                                | Number BP | CC term                            | Number CC |
|------------------------------------------------|-----------|------------------------------------------------------------------------|-----------|------------------------------------|-----------|
| GO:0042802 (identical protein binding)         | 1379      | GO:0045893 (positive regulation of transcription, DNA-templated)       | 334       | GO:0005654 (nucleoplasm)           | 2355      |
| GO:0003723 (RNA binding)                       | 797       | GO:0045892 (negative regulation of transcription, DNA-templated)       | 256       | GO:0070062 (extracellular exosome) | 1959      |
| GO:0042803 (protein homodimerization activity) | 543       | GO:0045944 (positive regulation of transcription by RNA polymerase II) | 253       | GO:0005829 (cytosol)               | 1940      |
| GO:0019899 (enzyme binding)                    | 305       | GO:0010628 (positive regulation of gene expression)                    | 245       | GO:0005634 (nucleus)               | 1510      |
| GO:0019901 (protein kinase binding)            | 262       | GO:0008284 (positive regulation of cell population proliferation)      | 220       | GO:0005737 (cytoplasm)             | 1347      |

We also identified the terms that most commonly appear in PAN-GO annotations compared to predicted (IEA) GO annotations for the same gene, and vice-versa. Supplementary Table 4 shows that PAN-GO tends to annotate transcription factor-related terms that are missing from the IEA annotations, as well as the molecular functions of *olfactory receptor* and *ubiquitin-protein ligase* activities, and the biological process of *innate immune response*. The IEA molecular function annotations (Supplemental Table 5) tend to favor terms that capture cofactor binding (*zinc*, and the generic *metal ion*) as well as *ATP binding*, which are considered in PAN-GO to be required for the function, but not actually representing the function itself. Many of the highly used IEA terms are very non-specific, and PAN-GO often contains much more specific terms instead; examples of such non-specific terms include *DNA binding*, *apoptotic process*, and *regulation of catalytic activity*. Interestingly, many of the same terms appear in both lists, indicating that they are used in both PAN-GO and predicted annotations, but there is disagreement about which genes are annotated with those terms. In many cases, these discrepancies can be explained by the fact that all PAN-GO annotations are traceable to specific experimental evidence, which is not the case for the IEA annotations.

**Supplementary Table 4. Most frequent GO terms in PAN-GO but not IEA for same gene**

| MF term                                                                                      | Number MF | BP term                                                                | Number BP | CC term                          | Number CC |
|----------------------------------------------------------------------------------------------|-----------|------------------------------------------------------------------------|-----------|----------------------------------|-----------|
| GO:0000978 (RNA polymerase II cis-regulatory region sequence-specific DNA binding)           | 830       | GO:0006357 (regulation of transcription by RNA polymerase II)          | 681       | GO:0005634 (nucleus)             | 2064      |
| GO:0000981 (DNA-binding transcription factor activity, RNA polymerase II-specific)           | 825       | GO:0045087 (innate immune response)                                    | 202       | GO:0005737 (cytoplasm)           | 1507      |
| GO:0000977 (RNA polymerase II transcription regulatory region sequence-specific DNA binding) | 200       | GO:0000122 (negative regulation of transcription by RNA polymerase II) | 164       | GO:0005886 (plasma membrane)     | 1008      |
| GO:0004984 (olfactory receptor activity)                                                     | 187       | GO:0007165 (signal transduction)                                       | 153       | GO:0005615 (extracellular space) | 803       |
| GO:0061630 (ubiquitin protein ligase activity)                                               | 169       | GO:0007186 (G protein-coupled receptor signaling pathway)              | 142       | GO:0005829 (cytosol)             | 704       |

**Supplementary Table 5. Most frequent GO terms in IEA but not PAN-GO for same gene**

| MF term                                          | Number MF | BP term                                                                             | Number BP | CC term                                     | Number CC |
|--------------------------------------------------|-----------|-------------------------------------------------------------------------------------|-----------|---------------------------------------------|-----------|
| GO:0046872 (metal ion binding)                   | 2480      | GO:0007186 (G protein-coupled receptor signaling pathway)                           | 518       | GO:0016021 (integral component of membrane) | 3639      |
| GO:0005524 (ATP binding)                         | 1356      | GO:0050790 (regulation of catalytic activity)                                       | 406       | GO:0005737 (cytoplasm)                      | 1108      |
| GO:0008270 (zinc ion binding)                    | 539       | GO:0006915 (apoptotic process)                                                      | 384       | GO:0005634 (nucleus)                        | 1041      |
| GO:0004930 (G protein-coupled receptor activity) | 490       | GO:0030154 (cell differentiation)                                                   | 378       | GO:0005886 (plasma membrane)                | 896       |
| GO:0003677 (DNA binding)                         | 467       | GO:0050911 (detection of chemical stimulus involved in sensory perception of smell) | 362       | GO:0005576 (extracellular region)           | 664       |

### **Comparison of gene set enrichment analysis results**

The most common use case of GO annotations is in gene set enrichment. Yet a major confounder of enrichment analysis was identified and extensively documented in a seminal study by Ballouz *et al.*<sup>1</sup>, namely the presence of genes that are annotated to a large number of distinct GO terms. Highly annotated genes are often referred to as “multifunctional genes” and in some cases this is true, but as described above, in many cases primary annotations represent partial functions or downstream phenotypes rather than distinct functions. In their study, Ballouz *et al.* developed a method of



correcting for highly annotated genes, by retaining only the enriched GO terms that are robust to removing the most highly annotated genes.

There are no “gold standard” test sets for enrichment analysis. We therefore assessed the impact of using the PAN-GO annotations for GO enrichment analysis of three human gene sets that had been previously shown by Ballouz *et al.* to be biased by highly annotated genes, and used as detailed case studies. To perform our assessment, we added the PAN-GO annotation set to the PANTHER gene list analysis tool<sup>6</sup>, and analyzed each gene list using either the PAN-GO annotations alone, or all GO annotations (including experimental annotations, computational annotations, and PAN-GO). We describe the results for each distinct gene set below, and compare our results to the analyses by Ballouz *et al.* for these same case studies. The enrichment analysis tool we used, which includes PAN-GO annotations, is available at [functionome.geneontology.org](http://functionome.geneontology.org).

#### Case study 1: Genomic copy number variants (CNVs) in autism

Gilman *et al.*<sup>7</sup> used GO enrichment analysis to advance the hypothesis that perturbations of synaptic development and function underlie the autistic phenotype. Analyzing the list of 72 genes with CNVs found in cases compared to controls, they found 16 GO biological process terms (at a false discovery rate threshold  $FDR < 0.01$ ), only a few of which were brain-related, including *learning and memory* and *neuron development*. To support the hypothesis of the involvement of synapses, these results were combined with GO cellular component term enrichment, which included *synapse*. When we re-analyzed their list of 72 genes using all GO annotations, we find significant enrichment ( $FDR < 0.05$ ) for 47 groups of biological process terms (each group represents GO terms that are related in the ontology, and therefore have many genes in common), including a group of terms including *learning and memory* as observed in the original paper and by Ballouz *et al.* Yet Ballouz *et al.* find that the *learning and memory* enrichment is a likely artifact of highly annotated genes, and they show that their correction for highly annotated genes removes this enrichment, as well as many other terms. Interestingly, when we re-analyzed the same list of all 72 genes (i.e. not removing highly annotated genes) using only PAN-GO annotations, *learning and memory* is no longer enriched, and we find only 6 groups of enriched biological process terms, 3 of which are synapse-related: *receptor clustering*, *postsynapse organization*, and *chemical synaptic transmission*. Thus, using PAN-GO in the gene set enrichment analysis excludes some of the same terms that were excluded by using Ballouz *et al.*'s multifunctionality correction, while identifying terms that support the conclusions drawn by the

authors of the original paper, but without requiring sifting through tens of other enriched term clusters that were not considered as biologically relevant by the authors.

#### Case study 2: Gene expression changes in response to hypoxia

Manalo *et al.*<sup>8</sup> identified genes which were both 1) induced in response to hypoxia, and 2) induced by a constitutively active form of the HIF-1 transcription factor. Their own analysis of the 202 genes in this list identified a preponderance of transcription factors, collagens, and genes involved in signal transduction. Ballouz *et al.* found that enrichment analysis using GO biological process annotations identifies a large number of enriched terms. However, they find that after removing highly annotated genes, a much smaller number of enriched processes remain statistically significant, including *peptidyl-proline modification*, *cellular response to hypoxia*, and *collagen fibril organization*, which, as they point out, capture the main conclusions of the authors of the original paper. Our own re-analysis found similar results. When reanalyzing with all GO biological process annotations, we found 85 groups of significantly enriched (FDR<0.05) terms. This large number makes interpretation difficult. When confining the analysis to using only the PAN-GO annotations, we found only 8 significantly enriched groups, including terms identical to, or related to, all of the above terms highlighted by Ballouz *et al.*, as well as terms around transcriptional regulation which reflect the preponderance of transcription factors reported by Manalo *et al.* Again, enrichment analysis using the PAN-GO set is able to identify the main biologically relevant GO terms, while excluding many of the same terms that were excluded by the corrections proposed by Ballouz *et al.*, yet without requiring any correction to be made.

#### Case study 3: Genome-wide association studies of schizophrenia

Schmidt-Kastner *et al.*<sup>9</sup> performed a meta-analysis of the published literature to identify 42 schizophrenia candidate genes. The authors performed enrichment analysis of this gene list and found many enriched terms, but the two with the smallest P-values were *synaptic transmission* and *developmental process*, and these were reported in the paper. However, after correcting for highly annotated genes, Ballouz *et al.* found that no biological process terms were enriched to a level that reached statistical significance, though *synaptic transmission* was nearly significant. Our re-analysis of these 42 genes using all GO annotations resulted in significant (FDR<0.05) enrichment for an astounding 140 distinct groups of biological process terms, covering a broad range of very different processes. Consistent with the initially published analysis, in our re-analysis the two terms

with the smallest P-values were *synaptic transmission*, and *nervous system development* (a more specific term than the initially reported *developmental process*). When we analyzed the same gene list using only PAN-GO annotations, we found 6 groups of biological processes to be significantly enriched (FDR<0.05), including 3 groups around even more specific and informative GO terms: *anterograde trans-synaptic transmission*, *modulation of trans-synaptic signaling*, and *neuron differentiation*. In this case, the enrichment results using PAN-GO are not only targeted toward the biological interpretation reported by the authors, but also they yield more specific and informative insights.

These case studies demonstrate that the PAN-GO annotations are valuable not only for what they add to the experimental annotations, but also for what they subtract, or exclude, from the set of GO annotations for each human gene.

## **Comparing PAN-GO annotations to automatic function prediction methods not in the GO knowledgebase**

A number of automatic function prediction (AFP) methods have been developed, and many of these have been assessed in the Critical Assessment of Function Annotation (CAFA) competitions<sup>10, 11</sup>. The CAFA competitions have established assessment metrics for comparing the predictions from AFP methods. The basic procedure is to set a date cutoff for predictions (thus limiting the predictions to using only experimental GO annotations that were available before the date cutoff), and then use new experimental GO annotations that accrue after the cutoff date as a “test set” for assessment. Proxy measures of precision and recall are then calculated using the “protein-centric precision” and “protein-centric recall” as defined by Clark and Radivojac<sup>12</sup>. Because AFP methods include a prediction score (reflecting the relative certainty of the prediction) protein-centric precision and protein-centric recall can be calculated at different score thresholds, and  $F_{\max}$ , the maximum F score (the harmonic mean of protein-centric precision and recall) across a range of score thresholds, is compared between AFP methods.

Although PAN-GO represents a curated integration and careful selection of GO terms in the context of phylogenetic models, and is not an AFP method, the PAN-GO annotations based only on

experimental evidence in homologous genes can be considered to be predictions, as they have not yet been established by direct experimental evidence. To compare these predictions in PAN-GO to AFP methods, we used the datasets we created for PAN-GO validation, as described in Methods. These datasets comprise a “test set” of annotations to be predicted (all newly accumulated experimental GO annotations after October 2019), a “training set” of experimental GO annotations (all experimental GO annotations prior to October 2019) and the set of PAN-GO predicted annotations as of October 2019 for evaluating against the test set. We then calculated protein-centric precision and protein-centric recall for PAN-GO (as of October 2019), as well as for different AFP methods. We selected several top-performing AFP methods from the CAFA assessment and from CAFA-like assessments reported in the subsequent literature.

Only one of these AFP methods, DeepGOZero<sup>13</sup>, has made predicted annotations for human genes available for download, which we obtained at [https://deepgo.cbrc.kaust.edu.sa/data/deepgozero/zero\\_predictions.tar.gz](https://deepgo.cbrc.kaust.edu.sa/data/deepgozero/zero_predictions.tar.gz). For another method, PANNZER<sup>14, 15</sup>, a web server is available at <http://ekhidna2.biocenter.helsinki.fi/sanspanz/> that can accept all human protein coding gene sequences as input. For the other methods, to maximize comparability with PAN-GO from October 2019, for four additional AFP methods, DeepGOPlus<sup>16</sup>, DeepGOCNN, DiamondScore, and TALE<sup>17</sup>, we were able to install the code locally and retrain them using only the experimental GO annotations available prior to October 2019. The source code for DeepGOPlus, including the DeepGOCNN and DiamondScore modules, was downloaded from <https://github.com/bio-ontology-research-group/deepgoplus>. TALE was downloaded from <https://github.com/Shen-Lab/TALE>. Protein-centric precision, recall and F scores for each method are shown in Supplementary Table 6 (MF), Supplementary Table 7 (CC) and Supplementary Table 8 (BP); code for the calculations is provided at [https://github.com/geneontology/PAN-GO\\_CAFA\\_evaluation](https://github.com/geneontology/PAN-GO_CAFA_evaluation). For PAN-GO, there is only a single F score, but AFP methods include confidence scores and Supplementary Tables 6-8 show the results for all deciles of the confidence score.

As shown in Supplementary Tables 6, 7 and 8, using the  $F_{\max}$  metric from Clark and Radivojac, the single PAN-GO F score is greater than the  $F_{\max}$  for all AFP methods. This holds for all three aspects of GO, molecular function (MF, Supplementary Table 6), cellular component (CC, Supplementary Table 7) and biological process (BP, Supplementary Table 8). After PAN-GO, the more recently

developed methods (DeepGOPlus, DeepGOcnn, DiamondScore and TALE) have the next best  $F_{\max}$  values, despite the fact that the PANNZER web server was updated in June 2024 and in principle has access to the experimental annotations in the test set. Although it is also a more recent method, DeepGOZero performs poorly on our test set, which is expected because these are “zero-shot” predictions designed to predict GO terms that are rarely annotated in the GO knowledgebase.

We found the superior performance of PAN-GO surprising, as there are several reasons to expect that a CAFA-like evaluation would tend to underestimate the performance of PAN-GO. First, PAN-GO does not include confidence scores so only a single F score is available, while for AFP methods information in the test set is used to select the best F score among a range of score thresholds. But even more importantly, in the CAFA-like evaluation process, experimental annotations (accrued during a post-prediction time period) are treated as the absolute “true” annotations to be predicted. As described in the main text and Methods, PAN-GO annotations are selective, meaning that many experimental GO annotations for human genes (and related genes) have been intentionally left out of the PAN-GO set, when they are deemed to reflect redundant functional characteristics even if they appear in distinct branches of the ontology. Consequently, PAN-GO predictions should manifest an artificially low true positive rate (and therefore precision, recall and F score) on any test set composed of accrued experimental annotations. We interpret the surprisingly good performance of PAN-GO despite these drawbacks with caution, as the analysis focuses on only a single metric, for a single test set. Nevertheless, we note that PAN-GO is carefully curated and is designed to produce a select set of highly accurate, minimally redundant GO annotations. It has already been suggested that, rather than comparing to AFP methods, PAN-GO could instead be used to help assess AFP methods, and a previous study<sup>18</sup> demonstrated that a carefully constructed test set that balances both positive and negative annotations from PAN-GO can be used to estimate actual false positive rates, a known issue with the current CAFA metrics<sup>19</sup>.

Supplementary Tables 6, 7 and 8 also (right hand columns) show a comparison between the GO annotations from PAN-GO, and the predicted annotations from each AFP method at different score thresholds. Predicted annotations are first made non-redundant as described in Extended Data Figure 3. As expected, the degree of overlap with PAN-GO depends on the score threshold, but in all cases there are many PAN-GO annotations that are not predicted by a given AFP method. Among the AFP methods, PANNZER shows the greatest annotation overlap with PAN-GO at all score thresholds.

Except at the lowest score thresholds for some AFP methods, PAN-GO tends to produce a much smaller number of annotations than any AFP method, in keeping with its property of being highly selective, including only the most informative annotations.

**Supplementary Table 6. Comparison of molecular function (MF) annotations from PAN-GO to those generated by automatic prediction methods.**

For AFP methods, confidence scores are available so all values are calculated for different threshold fractions  $t$  of all predicted annotations. Precision, recall and F score are calculated using the definitions of Clark and Radivojac, treating experimental annotations for human genes accrued after the prediction date as the test set, as described above and in Methods. Bold indicates  $F_{\max}$ , the maximum F score (balancing precision and recall) for each annotation set. The comparison of annotated GO terms is shown in the rightmost columns. GO terms may be identical, have ancestor-descendant relationships in the ontology (one may be more specific than the other), or they may be unique to one method or the other.

| Method     | t   | Performance on MF test set |                        |                         | MF annotation comparison with PAN-GO |                      |                          |                  |                      |
|------------|-----|----------------------------|------------------------|-------------------------|--------------------------------------|----------------------|--------------------------|------------------|----------------------|
|            |     | Protein-centric Precision  | Protein-centric Recall | Protein-centric F score | Identical annotations                | PAN-GO more specific | AFP method more specific | Unique to PAN-GO | Unique to AFP method |
| PAN-GO     | -   | 0.497                      | 0.512                  | <b>0.504</b>            |                                      |                      |                          |                  |                      |
| DeepGOPlus | 0.1 | 0.525                      | 0.104                  | 0.174                   | 298                                  | 1438                 | 57                       | 7152             | 1036                 |
|            | 0.2 | 0.487                      | 0.182                  | 0.265                   | 772                                  | 1880                 | 199                      | 6096             | 1989                 |
|            | 0.3 | 0.455                      | 0.252                  | 0.324                   | 1308                                 | 1962                 | 353                      | 5335             | 3024                 |
|            | 0.4 | 0.426                      | 0.315                  | 0.362                   | 1859                                 | 1995                 | 492                      | 4622             | 4214                 |
|            | 0.5 | 0.397                      | 0.363                  | 0.379                   | 2358                                 | 1928                 | 653                      | 4049             | 5630                 |
|            | 0.6 | 0.377                      | 0.400                  | 0.388                   | 2882                                 | 1837                 | 809                      | 3494             | 7215                 |
|            | 0.7 | 0.364                      | 0.433                  | <b>0.396</b>            | 3443                                 | 1685                 | 962                      | 2967             | 8977                 |
|            | 0.8 | 0.344                      | 0.464                  | 0.395                   | 3830                                 | 1561                 | 1090                     | 2598             | 11064                |
|            | 0.9 | 0.327                      | 0.493                  | 0.393                   | 4147                                 | 1429                 | 1235                     | 2310             | 13105                |
|            | 1   | 0.309                      | 0.513                  | 0.386                   | 4443                                 | 1329                 | 1365                     | 2016             | 15225                |
| DeepGOCNN  | 0.1 | 0.443                      | 0.095                  | 0.157                   | 183                                  | 1174                 | 62                       | 7396             | 1147                 |
|            | 0.2 | 0.425                      | 0.146                  | 0.218                   | 336                                  | 1916                 | 150                      | 6417             | 2649                 |
|            | 0.3 | 0.392                      | 0.185                  | 0.252                   | 474                                  | 2333                 | 215                      | 5803             | 4279                 |
|            | 0.4 | 0.371                      | 0.223                  | 0.279                   | 637                                  | 2692                 | 293                      | 5215             | 5799                 |
|            | 0.5 | 0.352                      | 0.266                  | 0.303                   | 805                                  | 2981                 | 393                      | 4667             | 7319                 |
|            | 0.6 | 0.342                      | 0.303                  | 0.322                   | 972                                  | 3175                 | 502                      | 4225             | 8809                 |
|            | 0.7 | 0.331                      | 0.341                  | 0.336                   | 1141                                 | 3365                 | 604                      | 3775             | 10173                |
|            | 0.8 | 0.324                      | 0.382                  | 0.351                   | 1378                                 | 3522                 | 703                      | 3306             | 11563                |
|            | 0.9 | 0.317                      | 0.416                  | 0.360                   | 1717                                 | 3525                 | 807                      | 2882             | 12764                |
|            | 1   | 0.315                      | 0.448                  | <b>0.370</b>            | 2117                                 | 3365                 | 953                      | 2514             | 13731                |

|              |     |       |       |              |      |      |      |      |        |
|--------------|-----|-------|-------|--------------|------|------|------|------|--------|
| DiamondScore | 0.1 | 0.521 | 0.077 | 0.135        | 415  | 744  | 113  | 7504 | 762    |
|              | 0.2 | 0.486 | 0.168 | 0.250        | 1006 | 1041 | 234  | 6502 | 1623   |
|              | 0.3 | 0.459 | 0.245 | 0.319        | 1560 | 1249 | 349  | 5633 | 2506   |
|              | 0.4 | 0.430 | 0.307 | 0.358        | 2162 | 1244 | 494  | 4903 | 3516   |
|              | 0.5 | 0.401 | 0.351 | 0.374        | 2834 | 1137 | 675  | 4196 | 4594   |
|              | 0.6 | 0.382 | 0.387 | 0.384        | 3409 | 1059 | 849  | 3547 | 6020   |
|              | 0.7 | 0.362 | 0.427 | 0.392        | 3872 | 922  | 993  | 3103 | 7688   |
|              | 0.8 | 0.349 | 0.458 | 0.396        | 4225 | 856  | 1132 | 2704 | 9319   |
|              | 0.9 | 0.339 | 0.494 | <b>0.402</b> | 4389 | 1048 | 1242 | 2257 | 11287  |
|              | 1   | 0.324 | 0.524 | 0.400        | 4436 | 1302 | 1334 | 1891 | 13719  |
| DeepGOZero   | 0.1 | 0     | 0     | na           | 0    | 0    | 1    | 2697 | 309    |
|              | 0.2 | 0     | 0     | na           | 0    | 0    | 27   | 2674 | 620    |
|              | 0.3 | 0     | 0     | na           | 0    | 0    | 48   | 2659 | 957    |
|              | 0.4 | 0     | 0     | na           | 0    | 0    | 59   | 2648 | 1253   |
|              | 0.5 | 0     | 0     | na           | 0    | 0    | 68   | 2641 | 1534   |
|              | 0.6 | 0     | 0     | na           | 0    | 0    | 79   | 2635 | 1853   |
|              | 0.7 | 0     | 0     | na           | 0    | 0    | 82   | 2634 | 2145   |
|              | 0.8 | 0     | 0     | na           | 0    | 0    | 89   | 2627 | 2458   |
|              | 0.9 | 0     | 0     | na           | 0    | 0    | 91   | 2625 | 2757   |
|              | 1   | 0     | 0     | na           | 0    | 0    | 94   | 2624 | 2986   |
| PANNZER      | 0.1 | 0.268 | 0.038 | 0.067        | 693  | 104  | 151  | 8499 | 1577   |
|              | 0.2 | 0.273 | 0.079 | 0.122        | 1423 | 190  | 300  | 7547 | 3128   |
|              | 0.3 | 0.267 | 0.114 | 0.160        | 2126 | 270  | 449  | 6654 | 4689   |
|              | 0.4 | 0.265 | 0.149 | 0.191        | 2822 | 334  | 608  | 5772 | 6249   |
|              | 0.5 | 0.273 | 0.185 | 0.220        | 3487 | 407  | 783  | 4912 | 7749   |
|              | 0.6 | 0.277 | 0.223 | 0.247        | 4165 | 479  | 927  | 4067 | 9273   |
|              | 0.7 | 0.279 | 0.257 | 0.268        | 4870 | 547  | 1089 | 3200 | 10817  |
|              | 0.8 | 0.283 | 0.290 | 0.286        | 5551 | 601  | 1246 | 2388 | 12396  |
|              | 0.9 | 0.290 | 0.330 | 0.309        | 6206 | 655  | 1390 | 1604 | 13912  |
|              | 1   | 0.291 | 0.362 | <b>0.322</b> | 6894 | 701  | 1558 | 800  | 15475  |
| TALE         | 0.1 | 0.318 | 0.535 | <b>0.399</b> | 1785 | 1496 | 1264 | 4206 | 19772  |
|              | 0.2 | 0.201 | 0.618 | 0.303        | 2284 | 1479 | 1983 | 3413 | 44066  |
|              | 0.3 | 0.153 | 0.678 | 0.250        | 2620 | 1329 | 2549 | 3026 | 67918  |
|              | 0.4 | 0.124 | 0.718 | 0.211        | 2859 | 1245 | 3060 | 2726 | 91674  |
|              | 0.5 | 0.105 | 0.739 | 0.183        | 3049 | 1186 | 3554 | 2462 | 115690 |
|              | 0.6 | 0.090 | 0.759 | 0.160        | 3217 | 1101 | 4059 | 2264 | 139712 |
|              | 0.7 | 0.078 | 0.771 | 0.141        | 3350 | 1017 | 4583 | 2107 | 163612 |
|              | 0.8 | 0.067 | 0.783 | 0.123        | 3456 | 913  | 5120 | 2011 | 187772 |
|              | 0.9 | 0.057 | 0.790 | 0.106        | 3513 | 852  | 5835 | 1930 | 212576 |
|              | 1   | 0.046 | 0.797 | 0.088        | 3529 | 801  | 7113 | 1852 | 240918 |

**Supplementary Table 7. Comparison of cellular component (CC) annotations from PAN-GO to those generated by automatic prediction methods.**

For AFP methods, confidence scores are available so all values are calculated for different threshold fractions  $t$  of all predicted annotations. Precision, recall and F score are calculated using the definitions of Clark and Radivojac, treating experimental annotations for human genes accrued after the prediction date as the test set, as described above and in Methods. Bold indicates  $F_{\max}$ , the maximum F score (balancing precision and recall) for each annotation set. The comparison of annotated GO terms is shown in the rightmost columns. GO terms may be identical, have ancestor-descendant relationships in the ontology (one may be more specific than the other), or they may be unique to one method or the other.

| Method       | $t$ | Performance on CC test set |                        |                         | CC annotation comparison with PAN-GO |                      |                          |                  |                      |
|--------------|-----|----------------------------|------------------------|-------------------------|--------------------------------------|----------------------|--------------------------|------------------|----------------------|
|              |     | Protein-centric Precision  | Protein-centric Recall | Protein-centric F score | Identical annotations                | PAN-GO more specific | AFP method more specific | Unique to PAN-GO | Unique to AFP method |
| PAN-GO       | -   | 0.481                      | 0.464                  | <b>0.473</b>            | -                                    | -                    | -                        | -                | -                    |
| DeepGOPlus   | 0.1 | 0.629                      | 0.101                  | 0.174                   | 702                                  | 3457                 | 108                      | 5224             | 1444                 |
|              | 0.2 | 0.541                      | 0.194                  | 0.286                   | 1468                                 | 3526                 | 337                      | 4183             | 3784                 |
|              | 0.3 | 0.456                      | 0.264                  | 0.334                   | 1995                                 | 3258                 | 696                      | 3612             | 6662                 |
|              | 0.4 | 0.398                      | 0.322                  | 0.356                   | 2332                                 | 2929                 | 1186                     | 3231             | 9673                 |
|              | 0.5 | 0.368                      | 0.375                  | 0.372                   | 2743                                 | 2702                 | 1624                     | 2722             | 12781                |
|              | 0.6 | 0.345                      | 0.425                  | 0.381                   | 3056                                 | 2531                 | 2109                     | 2250             | 15931                |
|              | 0.7 | 0.323                      | 0.467                  | <b>0.382</b>            | 3245                                 | 2351                 | 2644                     | 1916             | 18982                |
|              | 0.8 | 0.301                      | 0.502                  | 0.376                   | 3435                                 | 2072                 | 3227                     | 1712             | 22147                |
|              | 0.9 | 0.283                      | 0.531                  | 0.370                   | 3528                                 | 1911                 | 3813                     | 1506             | 25422                |
|              | 1   | 0.270                      | 0.558                  | 0.364                   | 3665                                 | 1757                 | 4406                     | 1304             | 28736                |
| DeepGOCNN    | 0.1 | 0.611                      | 0.100                  | 0.172                   | 562                                  | 3713                 | 83                       | 5132             | 1570                 |
|              | 0.2 | 0.491                      | 0.170                  | 0.253                   | 1112                                 | 3494                 | 220                      | 4679             | 4211                 |
|              | 0.3 | 0.408                      | 0.223                  | 0.288                   | 1456                                 | 3199                 | 450                      | 4427             | 7061                 |
|              | 0.4 | 0.364                      | 0.278                  | 0.315                   | 1658                                 | 3008                 | 789                      | 4129             | 10003                |
|              | 0.5 | 0.326                      | 0.324                  | 0.325                   | 1734                                 | 2892                 | 1262                     | 3814             | 12932                |
|              | 0.6 | 0.309                      | 0.367                  | 0.335                   | 1738                                 | 2946                 | 1747                     | 3446             | 16091                |
|              | 0.7 | 0.289                      | 0.404                  | 0.337                   | 1764                                 | 3109                 | 2341                     | 2930             | 19324                |
|              | 0.8 | 0.280                      | 0.444                  | 0.343                   | 1977                                 | 3249                 | 2886                     | 2295             | 22634                |
|              | 0.9 | 0.276                      | 0.486                  | 0.352                   | 2323                                 | 3172                 | 3433                     | 1735             | 25811                |
|              | 1   | 0.272                      | 0.529                  | <b>0.359</b>            | 2804                                 | 2675                 | 4040                     | 1448             | 28233                |
| DiamondScore | 0.1 | 0.553                      | 0.081                  | 0.141                   | 644                                  | 1803                 | 207                      | 6694             | 1430                 |
|              | 0.2 | 0.516                      | 0.167                  | 0.253                   | 1424                                 | 2291                 | 536                      | 5177             | 3052                 |
|              | 0.3 | 0.484                      | 0.254                  | 0.333                   | 2196                                 | 2264                 | 917                      | 4102             | 4849                 |
|              | 0.4 | 0.433                      | 0.313                  | 0.363                   | 2843                                 | 1941                 | 1348                     | 3433             | 7017                 |
|              | 0.5 | 0.403                      | 0.363                  | 0.382                   | 3297                                 | 1710                 | 1791                     | 2911             | 9341                 |
|              | 0.6 | 0.372                      | 0.403                  | 0.387                   | 3622                                 | 1491                 | 2357                     | 2464             | 11749                |



|            |     |       |       |              |      |      |       |          |        |
|------------|-----|-------|-------|--------------|------|------|-------|----------|--------|
|            | 0.7 | 0.347 | 0.437 | 0.387        | 3777 | 1450 | 2808  | 2090     | 14655  |
|            | 0.8 | 0.332 | 0.479 | <b>0.392</b> | 3848 | 1487 | 3226  | 1760     | 17976  |
|            | 0.9 | 0.313 | 0.511 | 0.388        | 3807 | 1576 | 3694  | 1483     | 21101  |
|            | 1   | 0.294 | 0.541 | 0.381        | 3724 | 1710 | 4053  | 1272     | 24243  |
| DeepGOZero | 0.1 | 0     | 0     | na           | 0    | 0    | 285   | 8658     | 1863   |
|            | 0.2 | 0     | 0     | na           | 0    | 0    | 670   | 8290     | 4255   |
|            | 0.3 | 0     | 0     | na           | 0    | 0    | 1019  | 7962     | 6719   |
|            | 0.4 | 0     | 0     | na           | 0    | 0    | 1189  | 7848     | 9211   |
|            | 0.5 | 0     | 0     | na           | 0    | 0    | 1316  | 7782     | 12074  |
|            | 0.6 | 0     | 0     | na           | 0    | 0    | 1701  | 7768     | 14961  |
|            | 0.7 | 0     | 0     | na           | 0    | 0    | 1752  | 7730     | 18058  |
|            | 0.8 | 0     | 0     | na           | 0    | 0    | 1929  | 7627     | 20360  |
|            | 0.9 | 0     | 0     | na           | 0    | 0    | 2479  | 7444     | 22938  |
|            | 1   | 0     | 0     | na           | 0    | 0    | 2750  | 7318     | 25053  |
| PANNZER    | 0.1 | 0.255 | 0.032 | 0.057        | 667  | 154  | 141   | 8424     | 1684   |
|            | 0.2 | 0.267 | 0.061 | 0.100        | 1305 | 286  | 282   | 7532     | 3414   |
|            | 0.3 | 0.274 | 0.093 | 0.139        | 1942 | 415  | 410   | 6664     | 5183   |
|            | 0.4 | 0.296 | 0.129 | 0.180        | 2652 | 554  | 543   | 5732     | 6877   |
|            | 0.5 | 0.300 | 0.163 | 0.211        | 3344 | 672  | 677   | 4843     | 8567   |
|            | 0.6 | 0.303 | 0.193 | 0.236        | 4002 | 799  | 825   | 3977     | 10291  |
|            | 0.7 | 0.300 | 0.223 | 0.256        | 4636 | 894  | 944   | 3179     | 12073  |
|            | 0.8 | 0.304 | 0.252 | 0.276        | 5318 | 1011 | 1076  | 2310     | 13763  |
|            | 0.9 | 0.302 | 0.282 | 0.292        | 5962 | 1104 | 1210  | 1497.000 | 15455  |
|            | 1   | 0.305 | 0.313 | <b>0.309</b> | 6644 | 1174 | 1350  | 690.000  | 17167  |
| TALE       | 0.1 | 0.386 | 0.430 | <b>0.407</b> | 1701 | 2271 | 1811  | 2828     | 14359  |
|            | 0.2 | 0.271 | 0.617 | 0.376        | 1780 | 1970 | 3999  | 1979     | 30500  |
|            | 0.3 | 0.203 | 0.700 | 0.314        | 1825 | 1659 | 6179  | 1642     | 47717  |
|            | 0.4 | 0.161 | 0.748 | 0.265        | 1870 | 1405 | 8443  | 1482     | 65431  |
|            | 0.5 | 0.132 | 0.779 | 0.226        | 1877 | 1256 | 10709 | 1341     | 83282  |
|            | 0.6 | 0.112 | 0.802 | 0.196        | 1885 | 1147 | 12966 | 1251     | 100931 |
|            | 0.7 | 0.096 | 0.820 | 0.172        | 1877 | 1047 | 15220 | 1165     | 118175 |
|            | 0.8 | 0.084 | 0.833 | 0.152        | 1865 | 960  | 17601 | 1108     | 135373 |
|            | 0.9 | 0.073 | 0.843 | 0.134        | 1806 | 902  | 19899 | 1055     | 152181 |
|            | 1   | 0.066 | 0.848 | 0.122        | 1781 | 839  | 22384 | 1042     | 168837 |

**Supplementary Table 8. Comparison of biological process (BP) annotations from PAN-GO to those generated by automatic prediction methods.**

For AFP methods, confidence scores are available so all values are calculated for different threshold fractions  $t$  of all predicted annotations. Precision, recall and F score are calculated using the definitions of Clark and Radivojac, treating experimental annotations for human genes accrued after the prediction date as the test set, as described above and in Methods. Bold indicates  $F_{\max}$ , the maximum F score (balancing precision and recall) for each annotation set. The comparison of annotated GO terms is shown in the rightmost columns. GO terms may be identical, have ancestor-descendant relationships in the ontology (one may be more specific than the other), or they may be unique to one method or the other.

| Method       | $t$ | Performance on BP test set |                        |                         | BP annotation comparison with PAN-GO |                      |                          |                  |                      |
|--------------|-----|----------------------------|------------------------|-------------------------|--------------------------------------|----------------------|--------------------------|------------------|----------------------|
|              |     | Protein-centric Precision  | Protein-centric Recall | Protein-centric F score | Identical annotations                | PAN-GO more specific | AFP method more specific | Unique to PAN-GO | Unique to AFP method |
| PAN-GO       | -   | 0.334                      | 0.303                  | <b>0.318</b>            |                                      |                      |                          |                  |                      |
| DeepGOPlus   | 0.1 | 0.311                      | 0.095                  | 0.146                   | 592                                  | 5238                 | 321                      | 10313            | 10751                |
|              | 0.2 | 0.303                      | 0.179                  | 0.225                   | 1318                                 | 6943                 | 837                      | 7489             | 23751                |
|              | 0.3 | 0.271                      | 0.246                  | 0.258                   | 2038                                 | 7189                 | 1355                     | 6169             | 38536                |
|              | 0.4 | 0.243                      | 0.297                  | 0.268                   | 2771                                 | 6904                 | 1886                     | 5375             | 54111                |
|              | 0.5 | 0.223                      | 0.339                  | <b>0.269</b>            | 3382                                 | 6629                 | 2419                     | 4762             | 70540                |
|              | 0.6 | 0.208                      | 0.374                  | 0.267                   | 4087                                 | 6202                 | 3010                     | 4168             | 86269                |
|              | 0.7 | 0.193                      | 0.403                  | 0.261                   | 4660                                 | 5893                 | 3625                     | 3631             | 102452               |
|              | 0.8 | 0.182                      | 0.428                  | 0.256                   | 5126                                 | 5489                 | 4207                     | 3294             | 118641               |
|              | 0.9 | 0.172                      | 0.453                  | 0.250                   | 5526                                 | 5044                 | 4875                     | 3059             | 134676               |
|              | 1   | 0.162                      | 0.474                  | 0.242                   | 5815                                 | 4702                 | 5546                     | 2856             | 150837               |
| DeepGOCNN    | 0.1 | 0.306                      | 0.075                  | 0.120                   | 299                                  | 5096                 | 293                      | 10790            | 12850                |
|              | 0.2 | 0.315                      | 0.136                  | 0.190                   | 557                                  | 7265                 | 632                      | 8170             | 29296                |
|              | 0.3 | 0.273                      | 0.184                  | 0.220                   | 766                                  | 8040                 | 942                      | 7020             | 47399                |
|              | 0.4 | 0.240                      | 0.229                  | 0.234                   | 1014                                 | 8725                 | 1285                     | 5918             | 66093                |
|              | 0.5 | 0.222                      | 0.269                  | 0.243                   | 1232                                 | 9199                 | 1742                     | 5017             | 84915                |
|              | 0.6 | 0.203                      | 0.307                  | <b>0.244</b>            | 1523                                 | 9279                 | 2198                     | 4440             | 102568               |
|              | 0.7 | 0.189                      | 0.340                  | 0.243                   | 1815                                 | 9284                 | 2713                     | 3931             | 119445               |
|              | 0.8 | 0.181                      | 0.371                  | 0.243                   | 2140                                 | 9042                 | 3243                     | 3597             | 134240               |
|              | 0.9 | 0.174                      | 0.400                  | 0.243                   | 2544                                 | 8615                 | 3822                     | 3328             | 145312               |
|              | 1   | 0.168                      | 0.431                  | 0.242                   | 3326                                 | 7753                 | 4405                     | 3099             | 152423               |
| DiamondScore | 0.1 | 0.296                      | 0.094                  | 0.143                   | 825                                  | 3638                 | 418                      | 11271            | 8175                 |
|              | 0.2 | 0.277                      | 0.172                  | 0.213                   | 1742                                 | 4987                 | 851                      | 8653             | 18448                |
|              | 0.3 | 0.254                      | 0.240                  | 0.247                   | 2578                                 | 5188                 | 1421                     | 7176             | 30298                |
|              | 0.4 | 0.233                      | 0.290                  | 0.258                   | 3370                                 | 5069                 | 1951                     | 6152             | 42833                |
|              | 0.5 | 0.211                      | 0.331                  | <b>0.258</b>            | 4100                                 | 4599                 | 2531                     | 5551             | 55771                |
|              | 0.6 | 0.193                      | 0.360                  | 0.251                   | 4677                                 | 4235                 | 3144                     | 5034             | 68584                |

|            |     |          |          |                 |       |      |      |       |        |
|------------|-----|----------|----------|-----------------|-------|------|------|-------|--------|
|            | 0.7 | 0.182    | 0.392    | 0.249           | 5081  | 3785 | 3884 | 4694  | 81448  |
|            | 0.8 | 0.171    | 0.414    | 0.242           | 5365  | 3669 | 4538 | 4249  | 96147  |
|            | 0.9 | 0.161    | 0.441    | 0.236           | 5640  | 3915 | 5069 | 3621  | 117968 |
|            | 1   | 0.158    | 0.471    | 0.237           | 5812  | 4450 | 5512 | 2813  | 143393 |
| DeepGOZero | 0.1 | 4.91E-06 | 7.07E-06 | <b>5.79E-06</b> | 0     | 0    | 149  | 16056 | 30727  |
|            | 0.2 | 1.51E-06 | 7.07E-06 | 2.49E-06        | 0     | 0    | 249  | 16011 | 60596  |
|            | 0.3 | 1.86E-06 | 1.41E-05 | 3.29E-06        | 0     | 0    | 385  | 15985 | 88453  |
|            | 0.4 | 1.41E-06 | 1.41E-05 | 2.57E-06        | 0     | 0    | 501  | 15964 | 115977 |
|            | 0.5 | 1.19E-06 | 1.41E-05 | 2.19E-06        | 0     | 0    | 591  | 15944 | 141425 |
|            | 0.6 | 9.88E-07 | 1.41E-05 | 1.85E-06        | 0     | 0    | 719  | 15917 | 167681 |
|            | 0.7 | 1.71E-06 | 2.97E-05 | 3.23E-06        | 0     | 0    | 842  | 15897 | 194520 |
|            | 0.8 | 1.58E-06 | 2.97E-05 | 3.00E-06        | 0     | 0    | 980  | 15838 | 222637 |
|            | 0.9 | 1.47E-06 | 2.97E-05 | 2.80E-06        | 0     | 0    | 1071 | 15828 | 250832 |
|            | 1   | 1.38E-06 | 2.97E-05 | 2.63E-06        | 0     | 0    | 1176 | 15808 | 277859 |
| PANNZER    | 0.1 | 0.191    | 0.017    | 0.032           | 1068  | 261  | 221  | 14621 | 5203   |
|            | 0.2 | 0.202    | 0.036    | 0.061           | 2123  | 460  | 411  | 13216 | 10420  |
|            | 0.3 | 0.210    | 0.049    | 0.080           | 3141  | 643  | 628  | 11852 | 15591  |
|            | 0.4 | 0.215    | 0.065    | 0.100           | 4203  | 823  | 845  | 10460 | 20767  |
|            | 0.5 | 0.223    | 0.079    | 0.117           | 5277  | 983  | 1030 | 9110  | 25994  |
|            | 0.6 | 0.230    | 0.095    | 0.135           | 6337  | 1125 | 1239 | 7777  | 31123  |
|            | 0.7 | 0.234    | 0.108    | 0.148           | 7359  | 1268 | 1438 | 6501  | 36315  |
|            | 0.8 | 0.233    | 0.121    | 0.159           | 8394  | 1394 | 1645 | 5239  | 41562  |
|            | 0.9 | 0.235    | 0.139    | 0.174           | 9433  | 1491 | 1845 | 4023  | 46666  |
|            | 1   | 0.238    | 0.153    | <b>0.186</b>    | 10528 | 1577 | 2052 | 2760  | 51804  |
| TALE       | 0.1 | 0.455    | 0.127    | 0.198           | 258   | 8029 | 152  | 5924  | 21085  |
|            | 0.2 | 0.348    | 0.229    | 0.276           | 425   | 7652 | 301  | 6039  | 43672  |
|            | 0.3 | 0.292    | 0.307    | <b>0.299</b>    | 543   | 7464 | 496  | 6010  | 65278  |
|            | 0.4 | 0.254    | 0.355    | 0.296           | 675   | 7578 | 708  | 5680  | 86772  |
|            | 0.5 | 0.225    | 0.391    | 0.286           | 778   | 7779 | 897  | 5296  | 108478 |
|            | 0.6 | 0.203    | 0.422    | 0.274           | 839   | 7898 | 1063 | 5029  | 129917 |
|            | 0.7 | 0.184    | 0.443    | 0.260           | 887   | 7999 | 1192 | 4812  | 150727 |
|            | 0.8 | 0.168    | 0.463    | 0.246           | 941   | 8019 | 1297 | 4684  | 171574 |
|            | 0.9 | 0.154    | 0.475    | 0.232           | 1029  | 7986 | 1390 | 4582  | 191359 |
|            | 1   | 0.146    | 0.484    | 0.225           | 1105  | 7927 | 1540 | 4519  | 212387 |

## References

- (1) Ballouz, S.; Pavlidis, P.; Gillis, J. Using predictive specificity to determine when gene set analysis is biologically meaningful. *Nucleic Acids Res* 2017, 45 (4), e20. DOI: 10.1093/nar/gkw957.
- (2) Burge, S.; Kelly, E.; Lonsdale, D.; Mutowo-Muellenet, P.; McAnulla, C.; Mitchell, A.; Sangrador-Vegas, A.; Yong, S. Y.; Mulder, N.; Hunter, S. Manual GO annotation of predictive protein signatures: the InterPro approach to GO curation. *Database (Oxford)* 2012, 2012, bar068. DOI: 10.1093/database/bar068.
- (3) Boeckmann, B.; Robinson-Rechavi, M.; Xenarios, I.; Dessimoz, C. Conceptual framework and pilot study to benchmark phylogenomic databases based on reference gene trees. *Brief Bioinform* 2011, 12 (5), 423-435. DOI: 10.1093/bib/bbr034.
- (4) Ashburner, M.; Ball, C. A.; Blake, J. A.; Botstein, D.; Butler, H.; Cherry, J. M.; Davis, A. P.; Dolinski, K.; Dwight, S. S.; Eppig, J. T.; et al. Gene ontology: tool for the unification of biology. The Gene Ontology Consortium. *Nat Genet* 2000, 25 (1), 25-29. DOI: 10.1038/75556.
- (5) Thomas, P. D. The Gene Ontology and the Meaning of Biological Function. *Methods Mol Biol* 2017, 3743-3741\_3742.
- (6) Mi, H.; Muruganujan, A.; Huang, X.; Ebert, D.; Mills, C.; Guo, X.; Thomas, P. D. Protocol Update for large-scale genome and gene function analysis with the PANTHER classification system (v.14.0). *Nat Protoc* 2019, 14 (3), 703-721. DOI: 10.1038/s41596-019-0128-8.
- (7) Gilman, S. R.; Iossifov, I.; Levy, D.; Ronemus, M.; Wigler, M.; Vitkup, D. Rare de novo variants associated with autism implicate a large functional network of genes involved in formation and function of synapses. *Neuron* 2011, 70 (5), 898-907. DOI: 10.1016/j.neuron.2011.05.021.
- (8) Manalo, D. J.; Rowan, A.; Lavoie, T.; Natarajan, L.; Kelly, B. D.; Ye, S. Q.; Garcia, J. G.; Semenza, G. L. Transcriptional regulation of vascular endothelial cell responses to hypoxia by HIF-1. *Blood* 2005, 105 (2), 659-669. DOI: 10.1182/blood-2004-07-2958.
- (9) Schmidt-Kastner, R.; van Os, J.; Esquivel, G.; Steinbusch, H. W.; Rutten, B. P. An environmental analysis of genes associated with schizophrenia: hypoxia and vascular factors as interacting elements in the neurodevelopmental model. *Mol Psychiatry* 2012, 17 (12), 1194-1205. DOI: 10.1038/mp.2011.183.
- (10) Radivojac, P.; Clark, W. T.; Oron, T. R.; Schnoes, A. M.; Wittkop, T.; Sokolov, A.; Graim, K.; Funk, C.; Verspoor, K.; Ben-Hur, A.; et al. A large-scale evaluation of computational protein function prediction. *Nat Methods* 2013, 10 (3), 221-227. DOI: 10.1038/nmeth.2340.
- (11) Zhou, N.; Jiang, Y.; Bergquist, T. R.; Lee, A. J.; Kacsoh, B. Z.; Crocker, A. W.; Lewis, K. A.; Georgiou, G.; Nguyen, H. N.; Hamid, M. N.; et al. The CAFA challenge reports improved protein function prediction and new functional annotations for hundreds of genes through experimental screens. *Genome Biol* 2019, 20 (1), 244. DOI: 10.1186/s13059-019-1835-8.
- (12) Clark, W. T.; Radivojac, P. Information-theoretic evaluation of predicted ontological annotations. *Bioinformatics* 2013, 29 (13), i53-61. DOI: 10.1093/bioinformatics/btt228.
- (13) Kulmanov, M.; Hoehndorf, R. DeepGOZero: improving protein function prediction from sequence and zero-shot learning based on ontology axioms. *Bioinformatics* 2022, 38 (Suppl 1), i238-i245. DOI: 10.1093/bioinformatics/btac256.
- (14) Koskinen, P.; Törönen, P.; Nokso-Koivisto, J.; Holm, L. PANNZER: high-throughput functional annotation of uncharacterized proteins in an error-prone environment. *Bioinformatics* 2015, 31 (10), 1544-1552. DOI: 10.1093/bioinformatics/btu851.
- (15) Törönen, P.; Holm, L. PANNZER-A practical tool for protein function prediction. *Protein Sci* 2022, 31 (1), 118-128. DOI: 10.1002/pro.4193.
- (16) Kulmanov, M.; Hoehndorf, R. DeepGOPlus: improved protein function prediction from sequence. *Bioinformatics* 2020, 36 (2), 422-429. DOI: 10.1093/bioinformatics/btz595.

- (17) Cao, Y.; Shen, Y. TALE: Transformer-based protein function Annotation with joint sequence-Label Embedding. *Bioinformatics* 2021, 37 (18), 2825-2833. DOI: 10.1093/bioinformatics/btab198.
- (18) Warwick Vesztrocy, A.; Dessimoz, C. Benchmarking gene ontology function predictions using negative annotations. *Bioinformatics* 2020, 36 (Suppl\_1), i210-i218. DOI: 10.1093/bioinformatics/btaa466.
- (19) Dessimoz, C.; Škunca, N.; Thomas, P. D. CAFA and the open world of protein function predictions. *Trends Genet* 2013, 29 (11), 609-610. DOI: 10.1016/j.tig.2013.09.005.
